# Supplementary material for: Estimating bite force in extinct dinosaurs using phylogenetically predicted physiological cross-sectional areas of jaw adductor muscles
Source: PeerJ. 2022 Jul 12;10:e13731. doi: 10.7717/peerj.13731 (PMC9285543; doi:10.7717/peerj.13731)
Supplement: Supplemental Information 2 [file peerj-10-13731-s002.xlsx]

## Sheet: Data
ID	Specimen	Taxon	L_Sk	W_Sk	W_Cond	mTemp	mQuad	mPt	Source
Allosaurus_Madsen_1976	Madsen_1976	Allosaurus_fragilis	773.461	300	80	19682.4	4497.76	17630.7	This study (Madsen 1979)
Archaeopteryx_Mayr2007/Paul1988	Archaeopteryx_Mayr2007/Paul1988	Archaeopteryx_lithographica	40	15	2.591	24.2865	3.8725	8.322	This study (Mayr 2007; Paul 1988)
Coelophysis_Colbert1989	Coelo_Colbert1989	Coelophysis_bauri	207.897	74	17	716.503	195.442	412.932	This study (Colbert 1989)
Syntarsus_Colbert1989	Syntarsus_Colbert1989	Coelophysis_rhodesiensis	209.153	77	18	797.313	212.171	595.353	This study (Colbert 1989)
Daspletosaurus_FMNH.PR308	FMNH.PR308	Daspletosaurus_torosus	1050	430	93	58200.7	10696	31249.5	This study (Russell 1970)
Daspletosaurus_NMC.8506	NMC.8506	Daspletosaurus_torosus	1036	452	120	60731.1	10696	31249.5	This study (Russell 1970)
Dromaeosaurus_AMNH.5356	AMNH.5356	Dromaeosaurus_albertensis	229	103	25	2764.45	430.927	1625.28	This study (Currie, 1995)
Euparkeria_Ewer1965	Euparkeria_Ewer1965	Euparkeria_capensis	83	49	7.5395	359.963	86.5225	269.88	This study (Ewer 1965)
Gorgosaurus_USNM.12814	USNM.12814	Gorgosaurus_libratus	795	390	82.5	44901.5	7056.21	20101.1	This study (Russell 1970)
Herrerasaurus_PVSJ407	PVSJ407	Herrerasaurus_ischigualastensis	310	107.7	28	3975.75	793.529	2210.61	This study (Sereno et al. 1994)
Lesothosaurus_Sereno1991/Nesbitt2011	Lesothosaurus_Sereno1991/Nesbitt2011	Lesothosaurus_diagnosticus	102	54	6.6685	530.403	71.465	270.133	This study (Sereno 1991a/Nesbitt 2011)
Majungasaurusu_FMNH.PR2100	FMNH.PR2100	Majungasaurus_crenatissimus	588	300	59	14142.7	3125.06	9859.19	This study (Witmer Pers Comms)
Ornithosuchus_Sereno1991/Walker1964	Ornithosuchus_Sereno1991/Walker1964	Ornithosuchus_woodwardi	460	260	57.8545	10365.1	2348.94	11275.7	This study (Sereno 1991b/Walker 1964)
Parasuchus_Sereno1991/Chatterjee1978	Parasuchus_Sereno1991/Chatterjee1978	Parasuchus_hislopi	593	183	41.5915	3592.94	1212.27	4893.68	This study (Sereno 1991b/Chatterjee 1978)
Riojasuchus_Sereno1991/Nesbitt2011	Riojasuchus_Sereno1991/Nesbitt2011	Riojasuchus_tenuisceps	97	55	10.1895	298.039	81.646	426.997	This study (Sereno 1991b/Nesbitt 2011)
Sinraptor_IVPP.10600	IVPP.10600	Sinraptor_dongi	886	384	82	27669	6529.92	12573	This study (Currie & Zhao, 1993)
Tarbosaurus_Witmer	Tarbosaurus_Witmer	Tarbosaurus_bataar	1258	616	138.75	90222.5	11789.7	35207.2	This study (Witmer Pers Comms)
Tyrannosaurus_AMNH.5027	AMNH.5027	Tyrannosaurus_rex	1411	900	174.5	115299	20505.3	110584	This study (Witmer Pers Comms)
Tyrannosaurus_BHI.3033.Witmer	BHI.3033	Tyrannosaurus_rex	1426	780	178	133563	17518.4	75042	This study (Witmer Pers Comms)
Erlikosaurus_IGM.100/111_L2012	IGM.100/111	Erlikosaurus_andrewsi	265	100	25	608.46	107.44	529.06	Lautenschlager 2012
Plateosaurus_MB.R.1937_L2016	MB.R.1937	Plateosaurus_engelhardti	350	123		518	177	192	Lautenschlager et al. 2016
Stegosaurus_NHMUK.PV.R36730_L2016	NHMUK.PV.R36730	Stegosaurus_stenops	375	153		1821	389	1337	Lautenschlager et al. 2016
Allosaurus_SMA.0005_BF2012	SMA.0005	Allosaurus_fragilis	725.702	298		4710	25630	15980	Bates and Falkingham 2012
Tyrannosaurus_BHI.3033_BF2012	BHI.3033	Tyrannosaurus_rex	1426	780	178	71700	72000	84200	Bates and Falkingham 2012
Tyrannosaurus_BHI.3033_GE2017	BHI.3033	Tyrannosaurus_rex	1265	772	178	45389.1	18662.1	50910.9	Gignac and Erickson 2017
Tyrannosaurus_FMNH.PR.2081_GE2017	FMNH.PR.2081	Tyrannosaurus_rex	1275	902	187	55468	21793.6	51397.3	Gignac and Erickson 2017
Tyrannosaurus_RTMP.81.6.1_GE2017	RTMP.81.6.1	Tyrannosaurus_rex	1172	705		43353.6	15578	40172	Gignac and Erickson 2017
Tyrannosaurus_MOR.008_GE2017	MOR.008	Tyrannosaurus_rex	1162	796		48949.6	21060.3	45357.3	Gignac and Erickson 2017
Tyrannosaurus_MOR.980_GE2017	MOR.980	Tyrannosaurus_rex	1282	815		50583.8	19339.5	46439.9	Gignac and Erickson 2017
Tyrannosaurus_LACM.23844_GE2017	LACM.23844	Tyrannosaurus_rex	1365	890	175	54730.1	20830.9	50713.5	Gignac and Erickson 2017
Tyrannosaurus_BHI.4100_GE2017	BHI.4100	Tyrannosaurus_rex	1115	592		36404.7	13179	33733	Gignac and Erickson 2017

## Sheet: Gignac2017
				Vertical Component of Contractile Muscle Force
	L_Sk	W_Sk			mames (Ny)	mamem (Ny)	mamep (Ny)	mamp (Ny)	mps (Ny)	mint (Ny)	mptd (Ny)	mptv (Ny)
BHI 3033	1265	772		BHI 3033	4032	1511	3962	3159	4053	2168	1265	11298
FMNH PR 2081	1275	902		FMNH PR 2081	4710.96	1765.44	4629.18	3690.96	4735.5	2533.08	1478.02	13200.5
RTMP 81.6.1	1172	705		RTMP 81.6.1	3682.07	1379.86	3618.15	2469.06	3701.25	1979.84	1155.21	10317.5
MOR 008	1162	796		MOR 008	4157.35	1557.97	4085.17	3566.76	4179	2447.84	1304.33	11649.2
MOR 980	1282	815		MOR 980	4256.58	1595.16	4182.68	3234.4	4411.77	2288.76	1335.46	11927.3
LACM 23844	1365	890		LACM 23844	4648.29	1741.96	4567.59	3449.71	4672.5	2499.38	1458.35	13024.9
BHI 4100	1115	592		BHI 4100	3091.9	1158.69	3038.22	2101.27	3108	1662.51	970.052	8663.75
				Physiological cross-sectiona area (cm2) based on N-y component
					mames	mamem	mamep	mamp	mps	mint	mptd	mptv
				BHI 3033	124.444	46.6358	122.284	97.5	125.093	66.9136	39.0432	348.704
				FMNH PR 2081	145.4	54.489	142.876	113.918	146.157	78.1814	45.6178	407.423
				RTMP 81.6.1	113.644	42.5884	111.671	76.2057	114.236	61.1063	35.6547	318.441
				MOR 008	128.313	48.0856	126.086	110.085	128.981	75.5507	40.257	359.544
				MOR 980	131.376	49.2334	129.095	99.8273	136.166	70.6406	41.2179	368.126
				LACM 23844	143.466	53.7641	140.975	106.472	144.213	77.1413	45.011	402.003
				BHI 4100	95.4289	35.7622	93.7721	64.8539	95.9259	51.312	29.9399	267.4
				Physiological cross-sectiona area (mm2)
					mames	mamem	mamep	mamp	mps	mint	mptd	mptv	mTemp	mQuad	mPt
				BHI 3033	12444.4	4663.58	12228.4	9750	12509.3	6691.36	3904.32	34870.4	41845.7	16441.4	38774.7
				FMNH PR 2081	14540	5448.9	14287.6	11391.8	14615.7	7818.14	4561.78	40742.3	48892.2	19210	45304.1
				RTMP 81.6.1	11364.4	4258.84	11167.1	7620.57	11423.6	6110.63	3565.47	31844.1	38214	13731.2	35409.5
				MOR 008	12831.3	4808.56	12608.6	11008.5	12898.1	7555.07	4025.7	35954.4	43146.6	18563.6	39980.1
				MOR 980	13137.6	4923.34	12909.5	9982.73	13616.6	7064.06	4121.79	36812.6	44587	17046.8	40934.4
				LACM 23844	14346.6	5376.41	14097.5	10647.2	14421.3	7714.13	4501.1	40200.3	48241.8	18361.4	44701.4
				BHI 4100	9542.89	3576.22	9377.21	6485.39	9592.59	5131.2	2993.99	26740	32088.9	11616.6	29734
				Physiological cross-sectiona area (cm2)
				BHI 3033	141.182	52.2244	128.963	108.893	131.522	77.7283	38.9499	470.159
				FMNH PR 2081	164.956	61.8175	162.092	129.24	165.815	88.6965	51.7532	462.22
				RTMP 81.6.1	128.929	48.3163	126.691	86.455	129.6	69.3248	40.4501	361.269
				MOR 008	145.571	54.5529	143.043	124.891	146.329	85.7119	45.6714	407.901
				MOR 980	149.045	55.8551	146.458	113.254	154.479	80.1415	46.7615	417.638
				LACM 23844	162.761	60.9951	159.936	120.792	163.609	87.5165	51.0647	456.071
				BHI 4100	108.264	40.572	106.384	73.5765	108.828	58.2132	33.9667	303.364
				Physiological cross-sectiona area (mm2)
					mames	mamem	mamep	mamp	mps	mint	mptd	mptv	mTemp	mQuad	mPt
				BHI 3033	14118.2	5222.44	12896.3	10889.3	13152.2	7772.83	3894.99	47015.9	45389.1	18662.1	50910.9
				FMNH PR 2081	16495.6	6181.75	16209.2	12924	16581.5	8869.65	5175.32	46222	55468	21793.6	51397.3
				RTMP 81.6.1	12892.9	4831.63	12669.1	8645.5	12960	6932.48	4045.01	36126.9	43353.6	15578	40172
				MOR 008	14557.1	5455.29	14304.3	12489.1	14632.9	8571.19	4567.14	40790.1	48949.6	21060.3	45357.3
				MOR 980	14904.5	5585.51	14645.8	11325.4	15447.9	8014.15	4676.15	41763.8	50583.8	19339.5	46439.9
				LACM 23844	16276.1	6099.51	15993.6	12079.2	16360.9	8751.65	5106.47	45607.1	54730.1	20830.9	50713.5
				BHI 4100	10826.4	4057.2	10638.4	7357.65	10882.8	5821.32	3396.67	30336.4	36404.7	13179	33733

## Sheet: Bates2012
Allosaurus
Muscle	Area_m2	Area_mm2	mTemp	mQuad	mPt
MAME caudal	0.00183	1830	4710	25630	15980
MAME cranial	0.00133	1330
MAME mid	0.00155	1550
MAMP caudal	0.00343	3430
MAMP cranial	0.0222	22200
MPT caudal	0.00886	8860
MPT cranial	0.00712	7120
Tyrannosaurus rex
Muscle	Area_m2	Area_mm2	mTemp	mQuad	mPt
MAME caudal	0.0323	32300	71700	72000	84200
MAME cranial	0.0174	17400
MAME mid	0.022	22000
MAMP caudal	0.052	52000
MAMP cranial	0.02	20000
MPT caudal	0.0497	49700
MPT cranial	0.0345	34500

## Sheet: Lautenschlager
Lautenschlager 2012; Lautenschlager et al. 2016
Erlikosaurus_andrewsi
Muscle	Area_mm2	F	sigma	mTemp	mQuad	mPt
mPtD	124.3	55.94	0.45004	608.46	107.44	529.06
mPtV	404.76	182.15	0.45002
mPsTP	29.96	13.49	0.450267
mPsTS	79.45	35.76	0.450094
mAMEP	173.56	78.11	0.450046
mAMEM	170.66	76.8	0.450018
mAMES	184.79	83.22	0.450349
mAMP	77.48	34.86	0.449923
			0.45
Lautenschlager et al. 2016
Plateosaurus_engelhardti
Muscle	Area_mm2	F	sigma	mTemp	mQuad	mPt
mPtD	79	35.55	0.45	518	177	192
mPtV	113	50.85	0.45
mPsTP	27	12.15	0.45
mPsTS	31	13.95	0.45
mAMEP	81	36.45	0.45
mAMEM	116	52.2	0.45
mAMES	290	130.5	0.45
mAMP	150	67.5	0.45
Lautenschlager et al. 2016
Stegosaurus_stenops
Muscle	Area_mm2	F	sigma	mTemp	mQuad	mPt
mPtD	390	175.5	0.45	1821	389	1337
mPtV	947	426.15	0.45
mPsTP	155	69.75	0.45
mPsTS	390	175.5	0.45
mAMEP	375	168.75	0.45
mAMEM	378	170.1	0.45
mAMES	678	305.1	0.45
mAMP	234	105.3	0.45
