# Supplementary material for: Estimating bite force in extinct dinosaurs using phylogenetically predicted physiological cross-sectional areas of jaw adductor muscles
Source: PeerJ. 2022 Jul 12;10:e13731. doi: 10.7717/peerj.13731 (PMC9285543; doi:10.7717/peerj.13731)
Supplement: Supplemental Information 3 [file peerj-10-13731-s003.xlsx]

## Sheet: PCSA_Anatomy
Taxon	L_Sk	W_Sk	mTemp	mQuad	mPt
Crocodylus_niloticus	497	290	2805.24	2597.98	19460.8
Caiman_crocodilus	111.11	69.8406	109.56	62.95	390.15
Alligator_mississippiensis	530	305.165	9900	5100	10100
Ornithosuchus_woodwardi	460	260	NA	NA	NA
Riojasuchus_tenuisceps	97	55	NA	NA	NA
Parasuchus_hislopi	593	183	NA	NA	NA
Lesothosaurus_diagnosticus	102	54	NA	NA	NA
Stegosaurus_stenops	391.82	159.37	NA	NA	NA
Plateosaurus_engelhardti	350	123	NA	NA	NA
Herrerasaurus_ischigualastensis	310	107.7	NA	NA	NA
Eoraptor_lunensis	120.002	40	NA	NA	NA
Coelophysis_bauri	268	80.5	NA	NA	NA
Coelophysis_rhodesiensis	209.153	77	NA	NA	NA
Zupaysaurus_rougieri	413.214	119	NA	NA	NA
Ceratosaurus_nasicornis	618.992	270	NA	NA	NA
Majungasaurus_crenatissimus	588	300	NA	NA	NA
Carnotaurus_sastrei	600	300	NA	NA	NA
Monolophosaurus_jiangi	853	243	NA	NA	NA
Spinosaurus_aegyptiacus	1734	451.475	NA	NA	NA
Suchomimus_tenerensis	1037	270	NA	NA	NA
Baryonyx_walkeri	1100	286.403	NA	NA	NA
Sinraptor_dongi	886	384	NA	NA	NA
Yangchuanosaurus_shangyouensis	810	292	NA	NA	NA
Allosaurus_fragilis	773.461	300	NA	NA	NA
Acrocanthosaurus_atokensis	1190.37	480	NA	NA	NA
Carcharodontosaurus_saharicus	1634.94	558	NA	NA	NA
Guanlong_wucaii	345	124	NA	NA	NA
Dilong_paradoxus	179	61.8	NA	NA	NA
Gorgosaurus_libratus	1040	467	NA	NA	NA
Teratophoneus_curriei	625.247	282	NA	NA	NA
Daspletosaurus_torosus	1033	525	NA	NA	NA
Tarbosaurus_bataar	1258	616	NA	NA	NA
Nanotyrannus_lancensis	602	261	NA	NA	NA
Tyrannosaurus_rex	1443	900	NA	NA	NA
Garudimimus_brevipes	260	84	NA	NA	NA
Gallimimus_bullatus	330	114	NA	NA	NA
Struthiomimus_altus	185	80	NA	NA	NA
Ornithomimus_edmontonicus	194	84	NA	NA	NA
Compsognathus_longipes	76	24.6	NA	NA	NA
Haplocheirus_sollers	222.996	52	NA	NA	NA
Shuvuuia_deserti	51.114	31	NA	NA	NA
Incisivosaurus_gauthieri	90.321	33.4	NA	NA	NA
Citipati_osmolskae	148	77	NA	NA	NA
Nemegtomaia_barsboldi	185	84	NA	NA	NA
Erlikosaurus_andrewsi	243	100	NA	NA	NA
Mei_long	53	26	NA	NA	NA
Zanabazar	275	110	NA	NA	NA
Sinornithosaurus_millenii	155	53.8	NA	NA	NA
Dromaeosaurus_albertensis	229	103	NA	NA	NA
Bambiraptor_feinbergorum	125.406	55.5	NA	NA	NA
Tsaagan_mangas	210	55	NA	NA	NA
Velociraptor_mongoliensis	280.593	91	NA	NA	NA
Deinonychus_antirrhopus	332	114.5	NA	NA	NA
Archaeopteryx_lithographica	39	16.8	NA	NA	NA
Confuciusornis_sanctus	NA	31.3	NA	NA	NA
Branta_canadensis	122	34.5	196.88	38.08	50.45
Gallus_gallus	74.5	32.4	62.25	30.21	51.53
Larus_fuscus	120.5	39.8	154.93	74	163
Falco_peregrinus	63	38	123.22	28.33	96.24
Falco_mexicanus	69.86	43	108.54	29.95	108.36
Falco_columbarius	45	27	43.88	10.5	36.3
Falco_sparverius	43	26	34.55	10.54	29.79
Buteo_buteo	80.3	42.7	134.65	20.9	73.25
Accipiter_striatus	44.53	25.19	25.93	6.43	22.47
Accipiter_cooperii	67.94	33.8	47.62	12.16	35.75
Myiopsitta_monachus	46.534	25.667	38.1	7.4	85.6
Padda_oryzivora	31.9	15.94	29.46	4.31	19.46
Geospiza_fortis	33.51	17.75	64.1	8.71	43.58
Struthio_camelus	192.28	95.634	382.45	125.06	344.497
Dromaius_novaehollandiae	163	81.6	195.78	97.4	201.48
Rhea_americana	169.7	72.6	505.14	97.96	348.31
Euparkeria_capensis	83	49	NA	NA	NA
Chrysemys_picta	31.3	20.3	165.43	21.85	14.1
Laudakia_stellio	24	18.9	68.45	24.72	111.62
Anolis_heterodermus	18.15	10.66	6.69	1.37	4.57
Anolis_chloris	15.34	7.77	4.33	0.82	2.04
Anolis_gundlachi	20.55	11.77	19.73	2.43	8.61
Anolis_pulchellus	14.02	6.88	7.72	0.73	4.3
Anolis_cristatellus	18.39	11.52	13.22	1.63	7.8
Anolis_distichus	13.86	8.94	3.83	0.71	1.9
Anolis_limifrons	10.87	5.67	1.81	0.41	0.74
Anolis_oxylophus	13.06	7.67	3.27	0.57	1.87
Anolis_valencienni	21.61	10.87	13.01	1.97	5.77
Anolis_carolinensis	19.9	10.56	10.68	2.31	6.96
Anolis_equestris	47.27	28.5	76.42	14.79	45.72
Dactyloa_frenata	29.42	18.01	33.79	5.63	12.03
Norops_humilis	10.38	6.75	8.59	2.84	2.37
Norops_auratus	12.47	6.16	3.11	0.62	1.55
Varanus_komodoensis	142	68	177.96	37.43	65.31
Varanus_bengalensis	60.08	35.5019	151.7	45.8	126.83
Corucia_zebrata	51.1	40.8	233.07	69.07	124.4
Sphenodon_punctatus	58.23	48.1876	187.86	58.54	225.1

## Sheet: PCSA_DrySkull
Taxon	L_Sk	W_Sk	mTemp	mQuad	mPt
Allosaurus_fragilis	773.461	300	19682.4	4497.76	17630.7
Archaeopteryx_lithographica	40	15	24.2865	3.8725	8.322
Coelophysis_bauri	207.897	74	716.503	195.442	412.932
Coelophysis_rhodesiensis	209.153	77	797.313	212.172	595.353
Daspletosaurus_torosus	1036	452	60731.1	10696	31249.5
Dromaeosaurus_albertensis	229	103	2764.45	430.926	1625.28
Erlikosaurus_andrewsi	265	100	608.46	107.44	529.06
Euparkeria_capensis	83	49	359.963	86.5225	269.88
Gorgosaurus_libratus	795	390	44901.5	7056.21	20101.1
Herrerasaurus_ischigualastensis	310	107.7	3975.75	793.529	2210.61
Lesothosaurus_diagnosticus	102	54	530.403	71.465	270.133
Majungasaurus_crenatissimus	588	300	14142.7	3125.06	9859.19
Ornithosuchus_woodwardi	460	260	10365.1	2348.94	11275.7
Parasuchus_hislopi	593	183	3592.94	1212.27	4893.68
Plateosaurus_engelhardti	350	123	518	177	192
Riojasuchus_tenuisceps	97	55	298.039	81.646	426.997
Sinraptor_dongi	886	384	27669	6529.92	12573
Stegosaurus_stenops	375	153	1821	389	1337
Tarbosaurus_bataar	1258	616	90222.5	11789.7	35207.2
Tyrannosaurus_rex	1411	900	115299	20505.3	110584
