# Supplementary material for: Estimating bite force in extinct dinosaurs using phylogenetically predicted physiological cross-sectional areas of jaw adductor muscles
Source: PeerJ. 2022 Jul 12;10:e13731. doi: 10.7717/peerj.13731 (PMC9285543; doi:10.7717/peerj.13731)
Supplement: Supplemental Information 5 [file peerj-10-13731-s005.xlsx]

## Sheet: mTemp
Taxon	pred_log_mPCSA	log_mPCSA	pMCMC	Cond	Prediction accuracy
Crocodylus_niloticus	3.72674	3.44797	0.225	1	0.871795
Caiman_crocodilus	2.6142	2.03965	0.0286667	0
Alligator_mississippiensis	3.4375	3.99564	0.0306667	0
Branta_canadensis	1.89538	2.2942	0.107667	1
Gallus_gallus	1.97795	1.79414	0.273667	1
Larus_fuscus	2.0968	2.19014	0.381667	1
Falco_peregrinus	1.92791	2.09068	0.033	0
Falco_mexicanus	2.12343	2.03559	0.151333	1
Falco_columbarius	1.67227	1.64227	0.380333	1
Falco_sparverius	1.65547	1.53845	0.167667	1
Buteo_buteo	1.92583	2.12921	0.131667	1
Accipiter_striatus	1.53718	1.4138	0.209333	1
Accipiter_cooperii	1.78605	1.67779	0.240333	1
Myiopsitta_monachus	1.72879	1.58092	0.306333	1
Padda_oryzivora	1.54882	1.46923	0.365667	1
Geospiza_fortis	1.47828	1.80686	0.0743333	1
Struthio_camelus	2.77616	2.58258	0.262	1
Dromaius_novaehollandiae	2.70228	2.29177	0.0853333	1
Rhea_americana	2.40069	2.70341	0.150333	1
Chrysemys_picta	1.43367	2.21861	0.0646667	1
Laudakia_stellio	1.50568	1.83537	0.222333	1
Anolis_heterodermus	1.00311	0.825426	0.187667	1
Anolis_chloris	0.698642	0.636488	0.387	1
Anolis_gundlachi	1.18186	1.29513	0.202667	1
Anolis_pulchellus	0.665232	0.887617	0.0593333	1
Anolis_cristatellus	1.18422	1.12123	0.330333	1
Anolis_distichus	0.932327	0.583199	0.0196667	0
Anolis_limifrons	0.317339	0.257679	0.309667	1
Anolis_oxylophus	0.590591	0.514548	0.265	1
Anolis_valencienni	0.948043	1.11428	0.167	1
Anolis_carolinensis	0.984226	1.02857	0.405667	1
Anolis_equestris	1.86888	1.88321	0.478	1
Dactyloa_frenata	1.45777	1.52879	0.372333	1
Norops_humilis	0.565498	0.933993	0.0253333	0
Norops_auratus	0.695697	0.49276	0.137667	1
Varanus_komodoensis	2.77121	2.25032	0.0506667	1
Varanus_bengalensis	1.82604	2.18099	0.116	1
Corucia_zebrata	2.21195	2.36749	0.355333	1
Sphenodon_punctatus	2.37504	2.27383	0.422	1

## Sheet: mQuad
Taxon	pred_log_mPCSA	log_mPCSA	pMCMC	Cond	Prediction accuracy
Crocodylus_niloticus	3.40186	3.41464	0.482333	1	0.871795
Caiman_crocodilus	2.30298	1.799	0.0306667	0
Alligator_mississippiensis	3.25243	3.70757	0.0543333	1
Branta_canadensis	1.39479	1.5807	0.267	1
Gallus_gallus	1.35259	1.48015	0.336333	1
Larus_fuscus	1.4405	1.86923	0.062	1
Falco_peregrinus	1.36051	1.45225	0.127	1
Falco_mexicanus	1.51831	1.4764	0.299333	1
Falco_columbarius	1.09081	1.02119	0.234	1
Falco_sparverius	1.03362	1.02284	0.458	1
Buteo_buteo	1.35107	1.32015	0.424333	1
Accipiter_striatus	0.854547	0.808211	0.376333	1
Accipiter_cooperii	1.11912	1.08493	0.404333	1
Myiopsitta_monachus	1.13894	0.869232	0.176667	1
Padda_oryzivora	0.770855	0.634477	0.249667	1
Geospiza_fortis	0.738255	0.940018	0.169333	1
Struthio_camelus	2.25116	2.09712	0.287333	1
Dromaius_novaehollandiae	2.09942	1.98856	0.357667	1
Rhea_americana	1.95733	1.99105	0.453333	1
Chrysemys_picta	0.955636	1.33945	0.215667	1
Laudakia_stellio	0.865368	1.39305	0.0943333	1
Anolis_heterodermus	0.286056	0.136721	0.218333	1
Anolis_chloris	-0.015952	-0.0861861	0.357667	1
Anolis_gundlachi	0.290337	0.385606	0.239333	1
Anolis_pulchellus	-0.185264	-0.136677	0.351333	1
Anolis_cristatellus	0.314257	0.212188	0.236333	1
Anolis_distichus	0.093651	-0.148742	0.064	1
Anolis_limifrons	-0.470911	-0.387216	0.239	1
Anolis_oxylophus	-0.0902278	-0.244125	0.091	1
Anolis_valencienni	0.218656	0.294466	0.319667	1
Anolis_carolinensis	0.217255	0.363612	0.190333	1
Anolis_equestris	1.17795	1.16997	0.482	1
Dactyloa_frenata	0.803755	0.750508	0.402667	1
Norops_humilis	-0.153537	0.453318	0	0
Norops_auratus	0.0903988	-0.207608	0.0393333	0
Varanus_komodoensis	2.27872	1.57322	0.00866667	0
Varanus_bengalensis	1.1617	1.66087	0.0476667	0
Corucia_zebrata	1.66173	1.83929	0.345333	1
Sphenodon_punctatus	1.82575	1.76745	0.449667	1

## Sheet: mPt
Taxon	pred_log_mPCSA	log_mPCSA	pMCMC	Cond	Prediction accuracy
Crocodylus_niloticus	3.88597	4.28916	0.116667	1	0.871795
Caiman_crocodilus	2.73975	2.59123	0.299333	1
Alligator_mississippiensis	4.04543	4.00432	0.451667	1
Branta_canadensis	1.84913	1.70286	0.304	1
Gallus_gallus	1.77789	1.71206	0.408333	1
Larus_fuscus	2.01583	2.21219	0.24	1
Falco_peregrinus	1.89078	1.98336	0.142667	1
Falco_mexicanus	2.04031	2.03487	0.471333	1
Falco_columbarius	1.60896	1.55991	0.314	1
Falco_sparverius	1.57485	1.47407	0.193333	1
Buteo_buteo	1.85815	1.86481	0.487333	1
Accipiter_striatus	1.35281	1.3516	0.498333	1
Accipiter_cooperii	1.65546	1.55328	0.246667	1
Myiopsitta_monachus	1.57644	1.93247	0.111333	1
Padda_oryzivora	1.4203	1.28914	0.271	1
Geospiza_fortis	1.33692	1.63929	0.0853333	1
Struthio_camelus	2.69566	2.53719	0.29	1
Dromaius_novaehollandiae	2.57564	2.30423	0.162333	1
Rhea_americana	2.35397	2.54197	0.242	1
Chrysemys_picta	1.49411	1.14922	0.247333	1
Laudakia_stellio	1.23621	2.04774	0.0196667	0
Anolis_heterodermus	0.665407	0.659916	0.49	1
Anolis_chloris	0.404345	0.30963	0.318667	1
Anolis_gundlachi	0.936616	0.935003	0.496	1
Anolis_pulchellus	0.337219	0.633468	0.0143333	0
Anolis_cristatellus	0.879633	0.892095	0.458333	1
Anolis_distichus	0.640815	0.278754	0.0136667	0
Anolis_limifrons	0.054646	-0.130768	0.0586667	1
Anolis_oxylophus	0.231421	0.271842	0.367	1
Anolis_valencienni	0.665326	0.761176	0.281667	1
Anolis_carolinensis	0.677129	0.842609	0.188667	1
Anolis_equestris	1.60722	1.66011	0.401333	1
Dactyloa_frenata	1.20593	1.08027	0.277333	1
Norops_humilis	0.274602	0.374748	0.279667	1
Norops_auratus	0.240839	0.190332	0.383	1
Varanus_komodoensis	2.72325	1.81498	0.000666667	0
Varanus_bengalensis	1.45833	2.10322	0.0123333	0
Corucia_zebrata	2.09931	2.09482	0.501667	1
Sphenodon_punctatus	2.22982	2.35238	0.405667	1
