# Supplementary material for: Estimating bite force in extinct dinosaurs using phylogenetically predicted physiological cross-sectional areas of jaw adductor muscles
Source: PeerJ. 2022 Jul 12;10:e13731. doi: 10.7717/peerj.13731 (PMC9285543; doi:10.7717/peerj.13731)
Supplement: Supplemental Information 6 [file peerj-10-13731-s006.xlsx]

## Sheet: mTemp
Taxon	pred_log_PCSA	log_PCSA	pMCMC	Cond	Prediction accuracy
Allosaurus_fragilis	3.81267	4.29408	0.0326667	0	0.25
Archaeopteryx_lithographica	2.43214	1.38536	0	0
Coelophysis_bauri	3.50295	2.85522	0.00366667	0
Coelophysis_rhodesiensis	2.42563	2.90163	0.0426667	0
Daspletosaurus_torosus	3.36715	4.78341	0.000333333	0
Dromaeosaurus_albertensis	3.15181	3.44161	0.124333	1
Erlikosaurus_andrewsi	3.02855	2.78423	0.112	1
Euparkeria_capensis	2.15619	2.55626	0.0283333	0
Gorgosaurus_libratus	2.76799	4.65226	0	0
Herrerasaurus_ischigualastensis	2.73996	3.59942	0.002	0
Lesothosaurus_diagnosticus	3.11966	2.72461	0.049	0
Majungasaurus_crenatissimus	3.82258	4.15053	0.166333	1
Ornithosuchus_woodwardi	3.91921	4.01557	0.417667	1
Parasuchus_hislopi	3.91633	3.55545	0.195	1
Plateosaurus_engelhardti	3.72609	2.71433	0.000666667	0
Riojasuchus_tenuisceps	4.28159	2.47427	0	0
Sinraptor_dongi	3.82748	4.44199	0.041	0
Stegosaurus_stenops	3.87528	3.26031	0.0266667	0
Tarbosaurus_bataar	4.12849	4.95531	0.00233333	0
Tyrannosaurus_rex	3.882	5.06183	0	0

## Sheet: mQuad
Taxon	pred_log_PCSA	log_PCSA	pMCMC	Cond	Prediction accuracy
Allosaurus_fragilis	3.34269	3.653	0.103	1	0.45
Archaeopteryx_lithographica	1.93514	0.587991	0	0
Coelophysis_bauri	3.02058	2.29102	0.000333333	0
Coelophysis_rhodesiensis	1.90673	2.32669	0.0546667	1
Daspletosaurus_torosus	2.89192	4.02922	0.000333333	0
Dromaeosaurus_albertensis	2.66489	2.6344	0.449	1
Erlikosaurus_andrewsi	2.5352	2.03117	0.00633333	0
Euparkeria_capensis	1.62654	1.93713	0.0543333	1
Gorgosaurus_libratus	2.27599	3.84857	0	0
Herrerasaurus_ischigualastensis	2.2307	2.89956	0.00533333	0
Lesothosaurus_diagnosticus	2.62425	1.85409	0	0
Majungasaurus_crenatissimus	3.35371	3.49486	0.329	1
Ornithosuchus_woodwardi	3.45943	3.37087	0.409667	1
Parasuchus_hislopi	3.45615	3.0836	0.177333	1
Plateosaurus_engelhardti	3.25228	2.24797	0.000333333	0
Riojasuchus_tenuisceps	3.8145	1.91193	0	0
Sinraptor_dongi	3.34227	3.81491	0.0796667	1
Stegosaurus_stenops	3.39358	2.58995	0.007	0
Tarbosaurus_bataar	3.65811	4.0715	0.0653333	1
Tyrannosaurus_rex	3.4133	4.31187	0.000666667	0

## Sheet: mPt
Taxon	pred_log_PCSA	log_PCSA	pMCMC	Cond	Prediction accuracy
Allosaurus_fragilis	3.77647	4.24627	0.0296667	0	0.35
Archaeopteryx_lithographica	2.3385	0.920228	0	0
Coelophysis_bauri	3.44697	2.61588	0	0
Coelophysis_rhodesiensis	2.32232	2.77477	0.039	0
Daspletosaurus_torosus	3.31129	4.49484	0.000333333	0
Dromaeosaurus_albertensis	3.08281	3.21093	0.307667	1
Erlikosaurus_andrewsi	2.95547	2.7235	0.108333	1
Euparkeria_capensis	2.04339	2.43117	0.0213333	0
Gorgosaurus_libratus	2.68872	4.30322	0	0
Herrerasaurus_ischigualastensis	2.65101	3.34451	0.006	0
Lesothosaurus_diagnosticus	3.04342	2.43158	0.00333333	0
Majungasaurus_crenatissimus	3.78158	3.99384	0.254333	1
Ornithosuchus_woodwardi	3.88531	4.05214	0.329667	1
Parasuchus_hislopi	3.88588	3.68964	0.314667	1
Plateosaurus_engelhardti	3.6846	2.2833	0	0
Riojasuchus_tenuisceps	4.25569	2.63042	0	0
Sinraptor_dongi	3.77113	4.09944	0.159	1
Stegosaurus_stenops	3.83085	3.12613	0.0153333	0
Tarbosaurus_bataar	4.10213	4.54663	0.051	1
Tyrannosaurus_rex	3.84786	5.04369	0	0
